# Supplementary material for: Synthesis of self-pillared pentasil zeolites without organic templates and seeds
Source: Royal Society of Chemistry journal article supplement (doi:10.1039/d4nr03824j), 2024-01-01
Supplement: d4nr03824j1.pdf [file d4nr03824j1.pdf]

## Supporting Information for

### Synthesis of Self-Pillared Pentasil Zeolites without Organic Templates and Seeds

Yuliang Guo,<sup>a,b</sup> Wenshu Tai,<sup>a,b</sup> Mingyu Zhao,<sup>c</sup> Xiao Chen,<sup>c</sup> Yuchao Chai,<sup>a</sup> Guangjun Wu,<sup>\*a</sup>  
Landong Li<sup>\*a</sup>

<sup>a</sup>Frontiers Science Center for New Organic Matter, College of Chemistry, Nankai University, Tianjin 300071, China;

<sup>b</sup>School of Materials Science and Engineering, Nankai University, Tianjin 300350, China;

<sup>c</sup>Department of Chemical Engineering, Tsinghua University, Beijing 100084, China.

\*Corresponding Authors

E-mail: [wuguangjun@nankai.edu.cn](mailto:wuguangjun@nankai.edu.cn); [lild@nankai.edu.cn](mailto:lild@nankai.edu.cn)

**This PDF contains:**

Figure S1-15

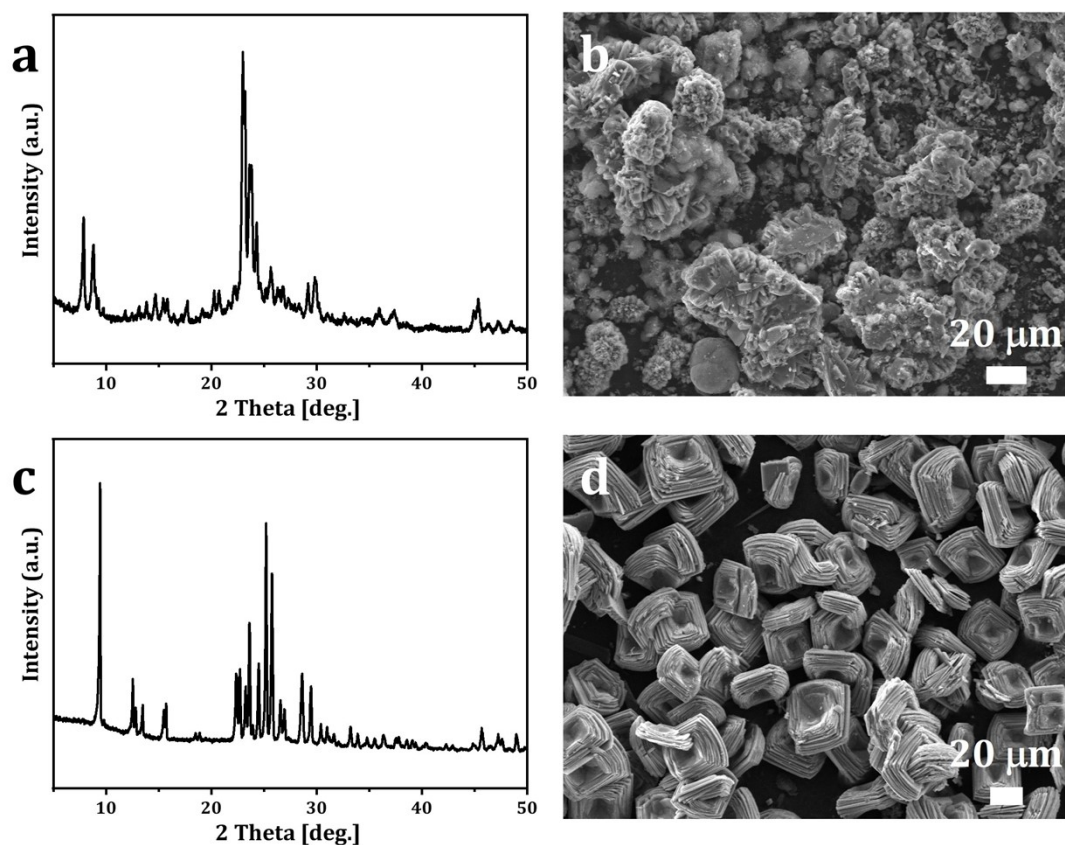

**Figure S1.** XRD patterns and SEM images of the samples synthesized with different cations: LiOH (a, b); KOH (c, d). (Aging at 90 °C for 12 h, crystallization at 175 °C for 4.5 days)

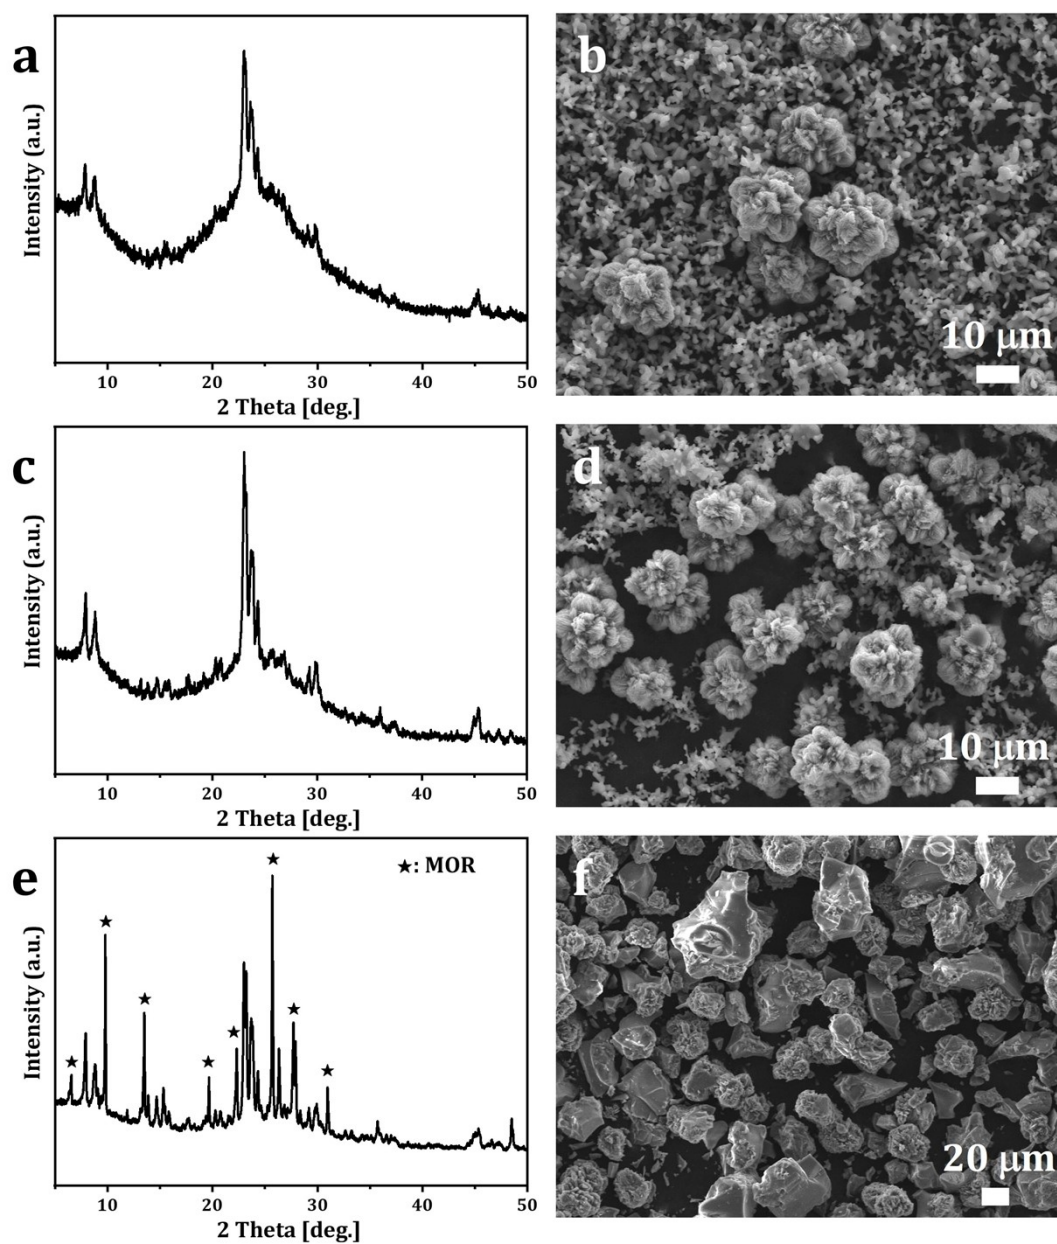

**Figure S2.** XRD patterns and SEM images of the samples synthesized with different NaOH/SiO<sub>2</sub> ratio: 0.05 (a, b), 0.1 (c, d) and 0.2 (e, f). (Aging at 90 °C for 12 h, crystallization at 175 °C for 4.5 days)

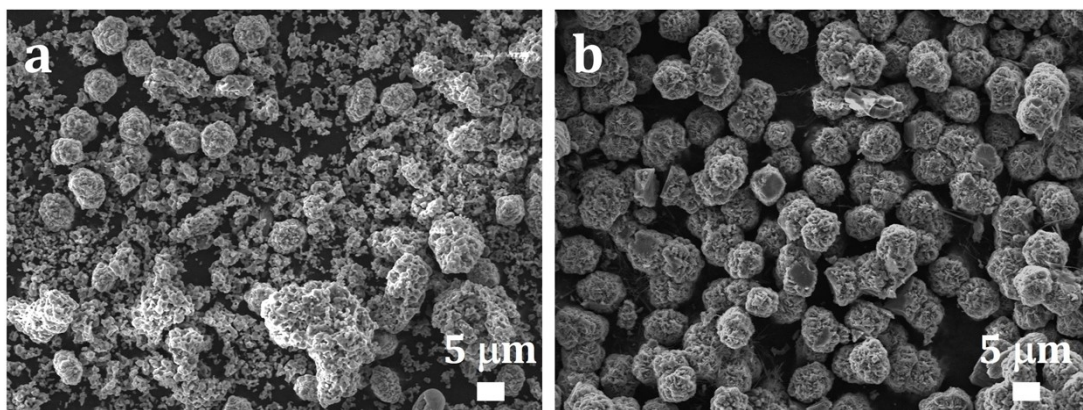

**Figure S3.** SEM images of the samples synthesized at different aging temperatures: 30 °C (a) and 60 °C (b). (Aging for 12 h, crystallization at 175 °C for 4.5 days)

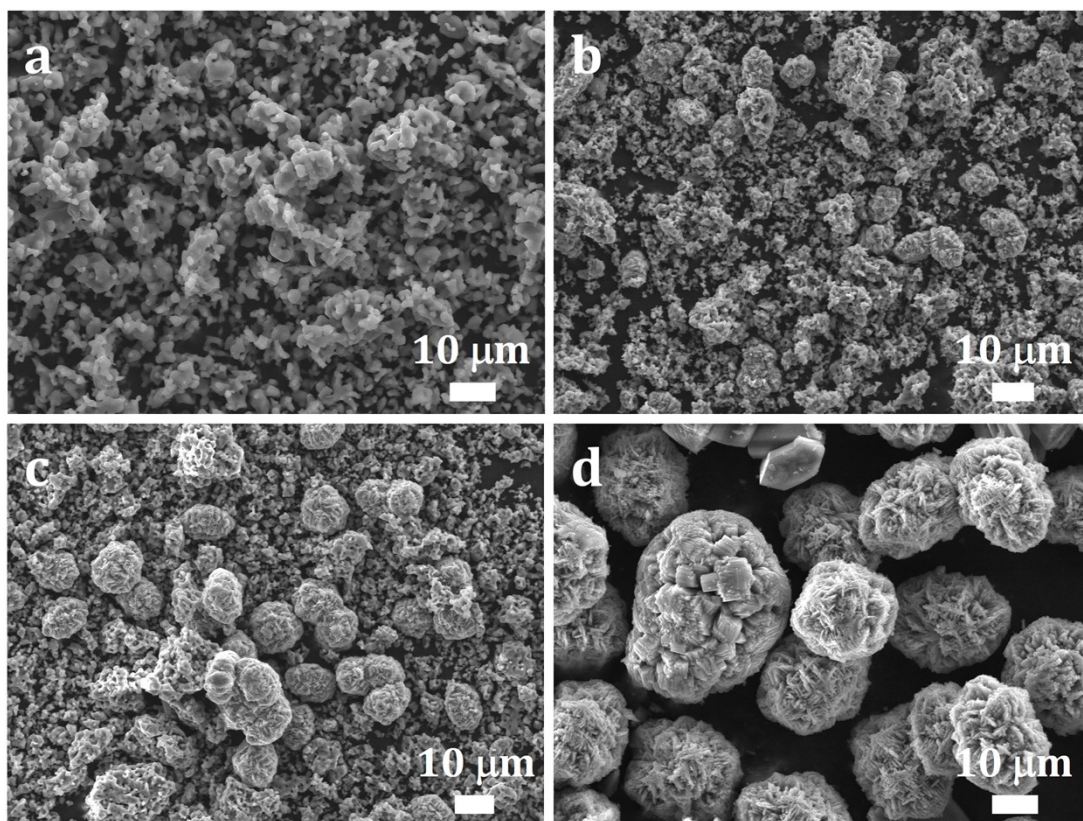

**Figure S4.** SEM images of the samples synthesized under different crystallization conditions: 150 °C for 4 days (a); 160 °C for 4 days (b); 170 °C for 4 days (c); 180 °C for 3 days (d).

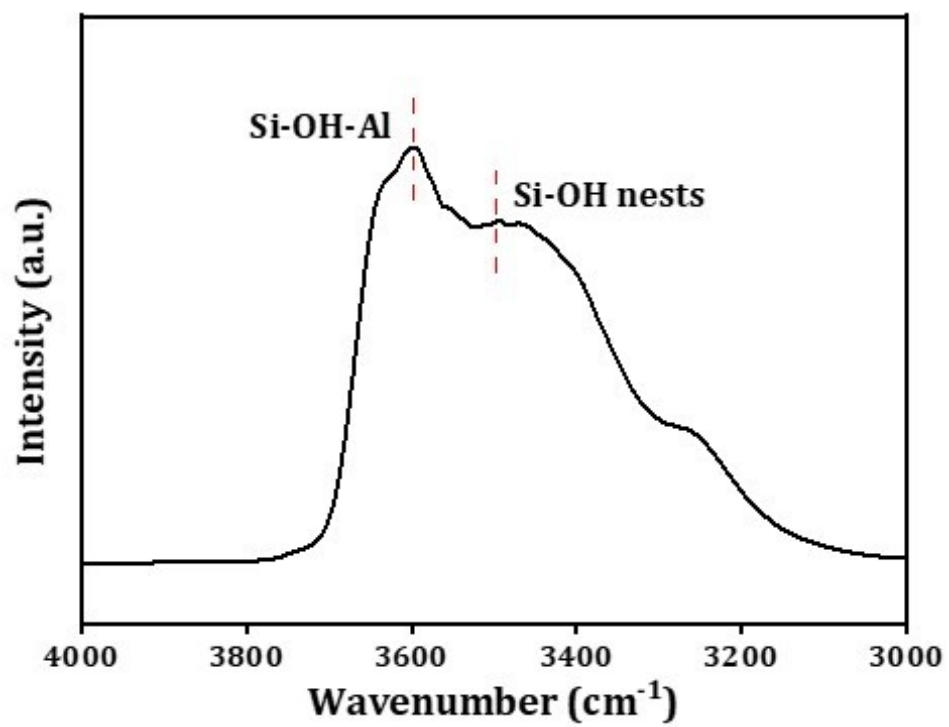

**Figure S5.** DRIFT spectrum of SPP zeolite in the hydroxyl region.

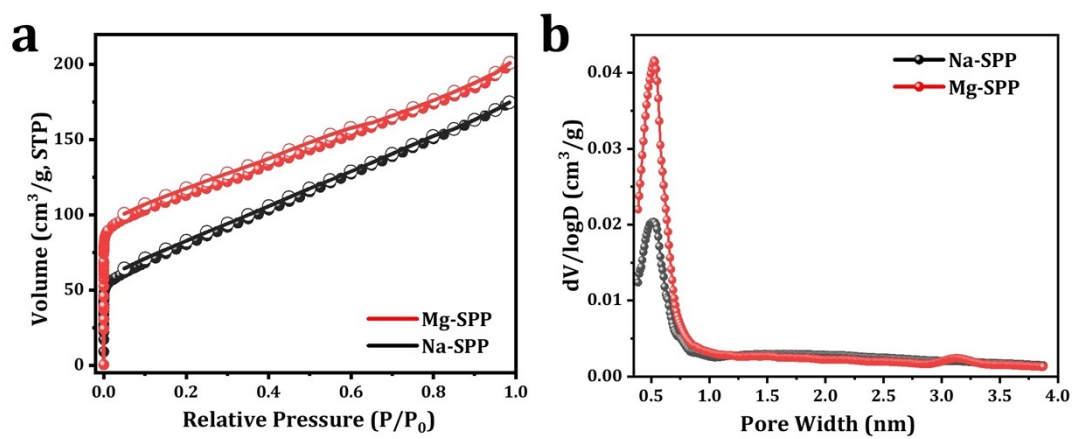

**Figure S6.** Ar adsorption/desorption isotherms (a) and pore distribution plots (b) calculated by SF methods of Na-SPP and Mg-SPP samples.

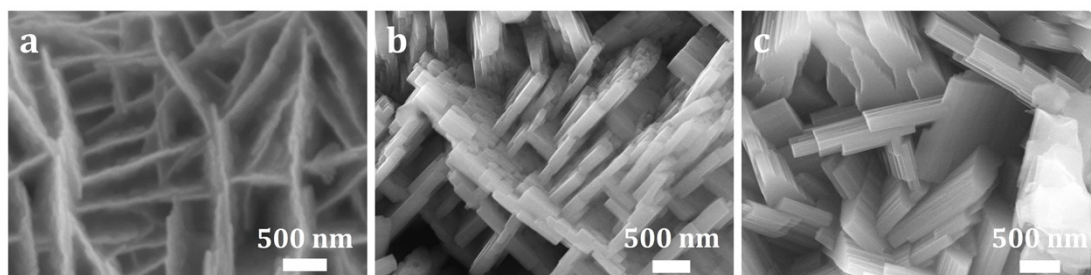

**Figure S7.** SEM images of the samples synthesized at 175 °C for different crystallization time: 4.5 days (a), 4.5 days + 2 h (b) and 4.5 days + 4 h (c).

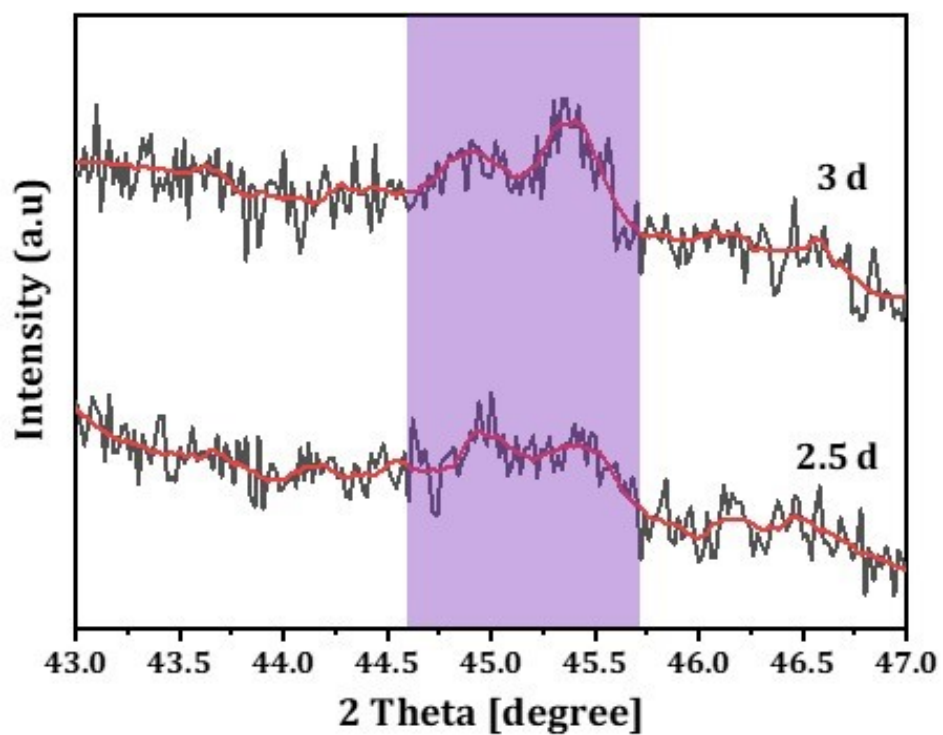

**Figure S8.** XRD patterns in the region 43–47° of the samples synthesized with different crystallization time.

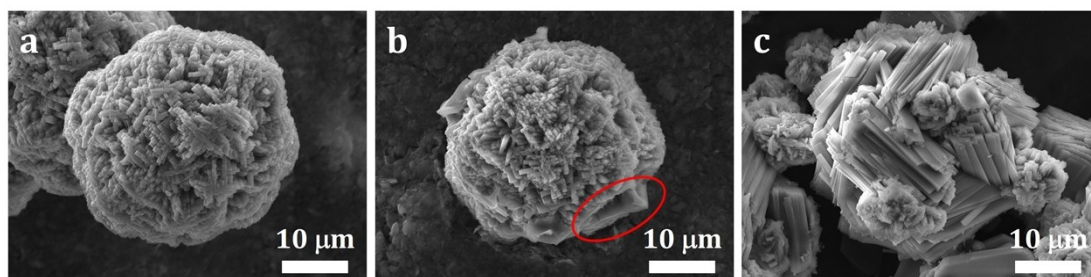

**Figure S9.** SEM images of the samples synthesized at 175 °C with different crystallization time: 4.5 days+ 4 h (a), 4.5 days + 8 h (b) and 5 days (c).

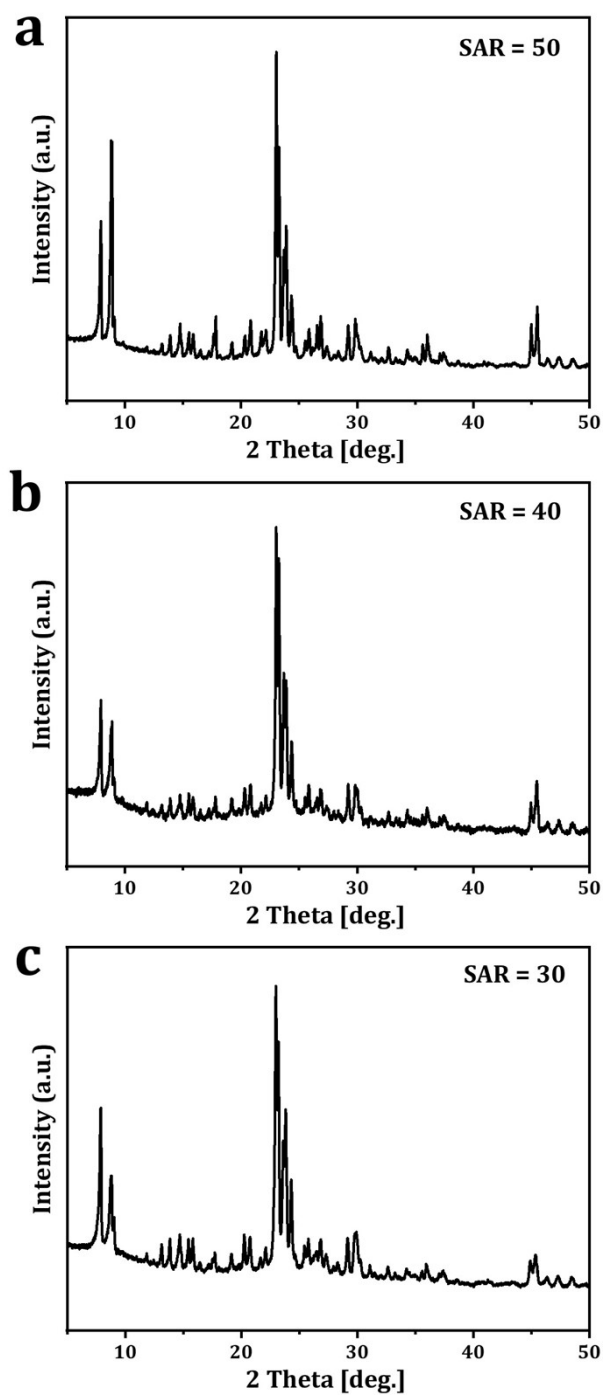

**Figure S10.** XRD patterns of samples with different SARs: 50 (a), 40 (b) and 30 (c).  
(Aging at 90 °C for 12 h, crystallization at 175 °C for 4.5 days)

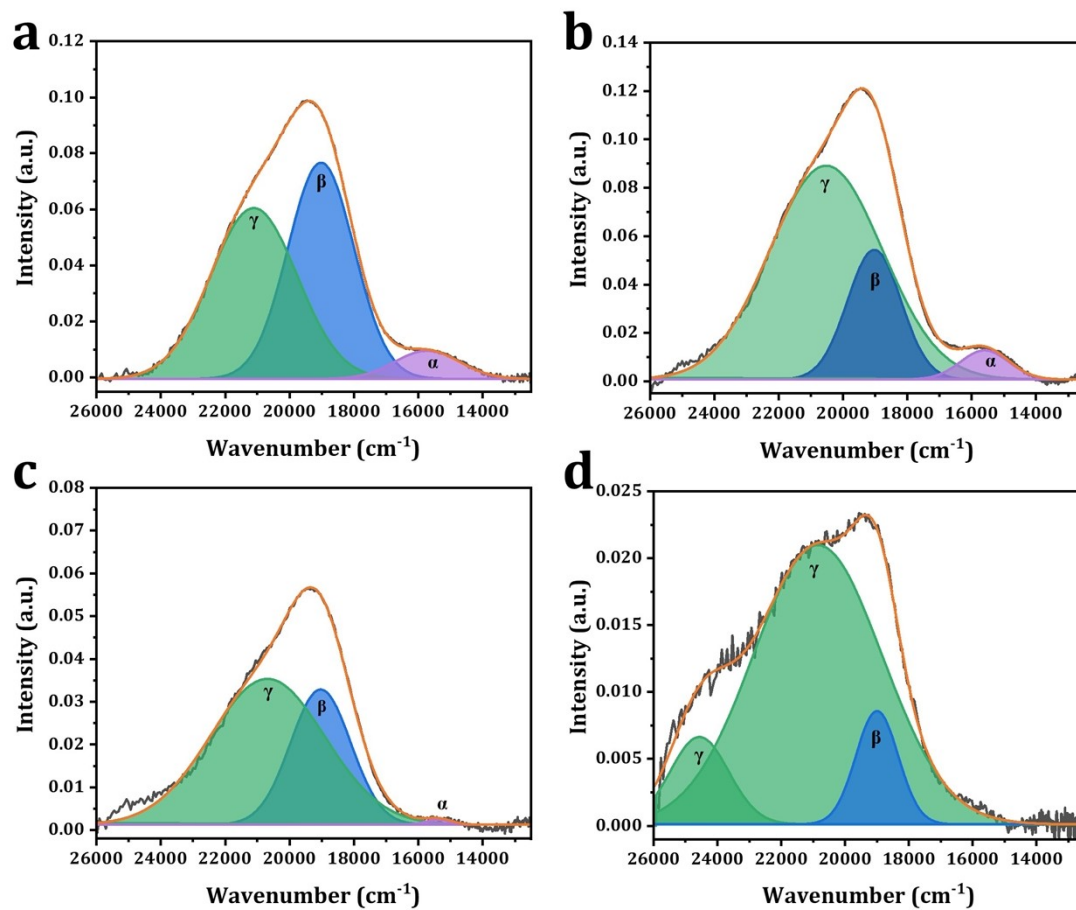

**Figure S11.** UV-vis spectra of Co<sup>2+</sup>-exchanged zeolite samples with different SARs: 20 (a), 30 (b), 40 (c) and 50 (d).

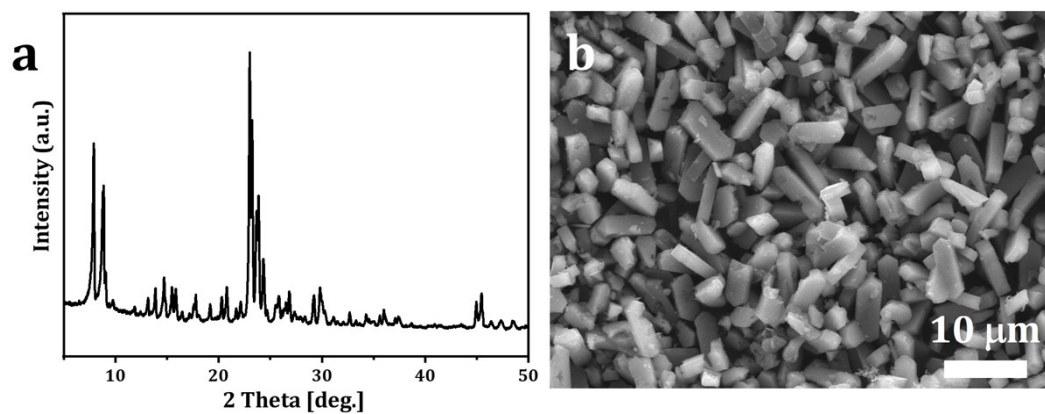

**Figure S12.** XRD pattern (a) and SEM image (b) of the sample synthesized by adding 10% obtained SPP zeolites as seeds into the gel with SAR of 50. (Aging at 90 °C for 12 h, crystallization at 175 °C for 4.5 days)

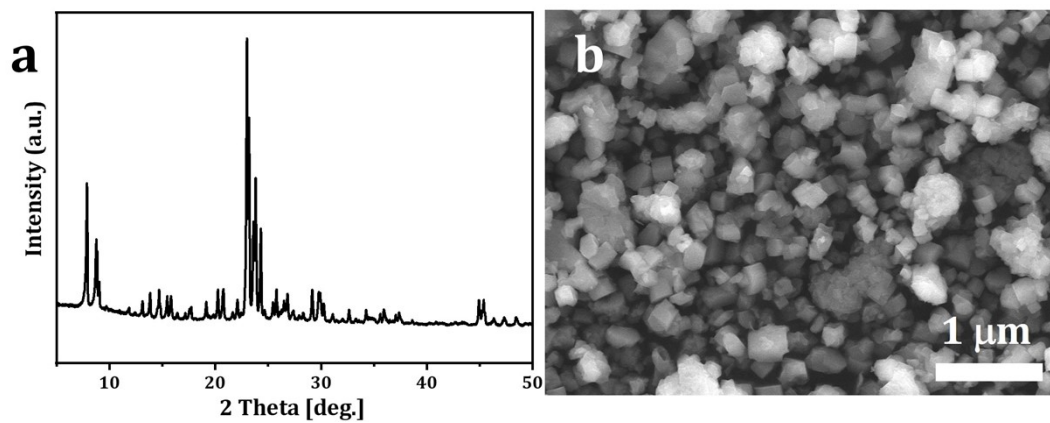

**Figure S13.** XRD pattern (a) and SEM image (b) of the commercial ZSM-5 with SAR of 28.

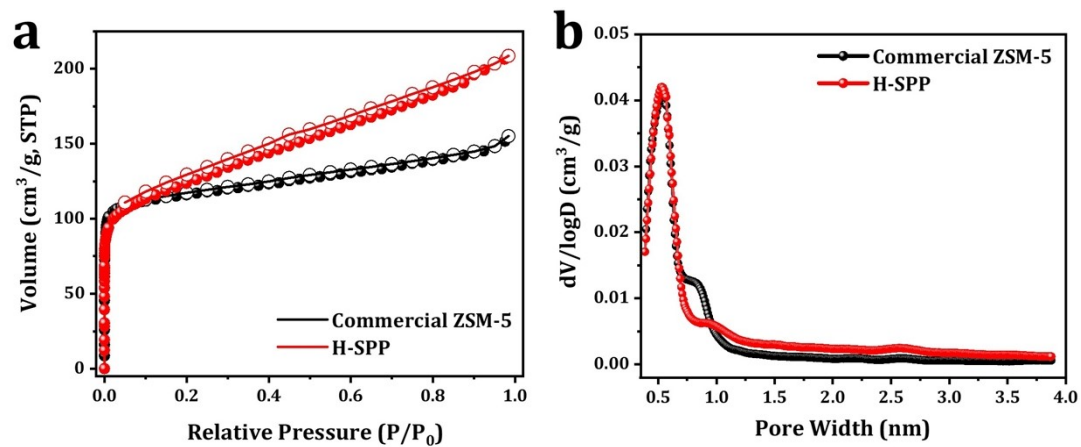

**Figure S14.** Ar adsorption/desorption isotherms (a) and pore distribution plots (b) of commercial ZSM-5 (SAR=28) and H-SPP zeolite.

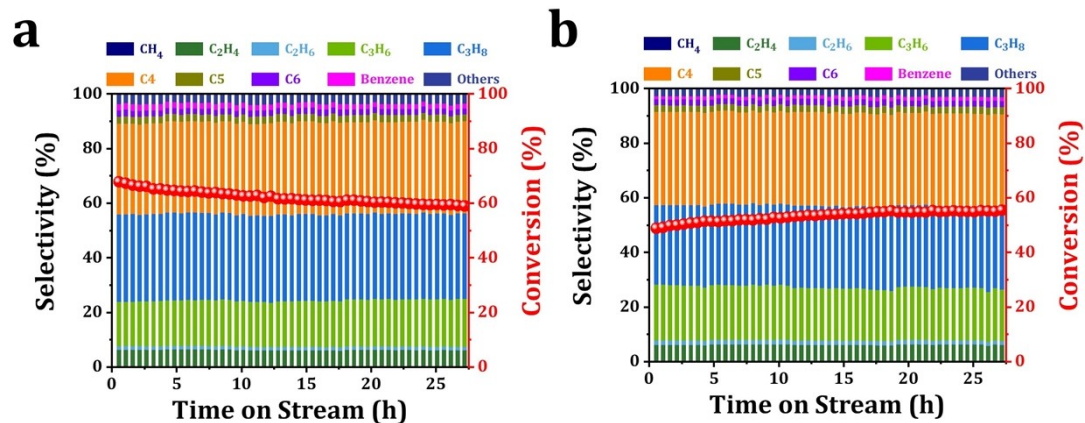

**Figure S15.** Catalytic cracking of n-heptane on H-SPP zeolites (a) and commercial ZSM-5 (b). Reaction conditions: WHSV= 4 h<sup>-1</sup>, T= 400 °C, total N<sub>2</sub> flow= 100 mL min<sup>-1</sup>.
